# Supplementary material for: Levelized cost analysis of indirect evaporative cooling in a data centre
Source: Royal Society of Chemistry journal article supplement (doi:10.1039/d5su00696a), 2025-11-06
Supplement: d5su00696a1.pdf [file d5su00696a1.pdf]

## Supplementary Information

### Levelized Cost Analysis of Indirect Evaporative Cooling in Data Centre

Qiumei Jing<sup>1</sup>, Muhammad Ahmad Jamil<sup>1</sup>, Chunjiang Jia<sup>2</sup>, Chong Ng<sup>2</sup>, Wei Wang<sup>3</sup>,  
Linhua Zhu<sup>4</sup>, Muhammad Wakil Shahzad<sup>1,\*</sup>, Ben Bin Xu<sup>1,\*</sup>

<sup>1</sup> Mechanical and Construction Engineering, Faculty of Engineering and Environment,  
Northumbria University, Newcastle upon Tyne, NE1 8ST, UK

<sup>2</sup> Offshore Renewable Energy Catapult, Blyth, NE24 1LZ, UK

<sup>3</sup> Department of Production and Automation Engineering, University of Skövde, 541  
28, Skövde, Sweden

<sup>4</sup> Key Laboratory of Tropical Medicinal Resource Chemistry of Ministry of Education,  
Key Laboratory of Functional Organic Polymers of Haikou, Tropical functional  
polymer materials Engineering Research Center of Hainan, College of Chemistry and  
Chemical Engineering, Hainan Normal University, Haikou, Hainan, 571158, China

\*E-mail address: [muhammad.w.shahzad@northumbria.ac.uk](mailto:muhammad.w.shahzad@northumbria.ac.uk);  
[ben.xu@northumbria.ac.uk](mailto:ben.xu@northumbria.ac.uk)

**Keywords:** Levelized cost, Cooling system, Indirect evaporative cooling, Data  
centre

**Table S1.** Summary of part of literature for IEC Application

| Reference | Cooling systems                                                     | Application   | COP           | Climate Zones Considered                                               | Location          | Cost analysis |
|-----------|---------------------------------------------------------------------|---------------|---------------|------------------------------------------------------------------------|-------------------|---------------|
| 1         | Single to multi/hybrid evaporative coolers                          | Building      | 0.1-7         | Arid, Semi-Arid, Humid Subtropical, Tropical Wet and Dry, Tropical Wet | India             | LCC           |
| 2         | Hybrid IEC-MVC                                                      | Building      | Not indicated | Hot and dry, hot and humid                                             | Saudi Arabia      | LCC           |
| 3         | direct contact evaporative coolers                                  | Building      | 7.8-29.2      | Tropical, Arid, Temperature, Cold                                      | Various countries | LCC           |
| 4         | Dew point cooling                                                   | Data Centre   | Avg.29.7      | Mild and humid                                                         | UK                | N/A           |
| 5         | IEC systems                                                         | Data Centre   | 3.15-9.26     | Dry, medium humidity, high humidity                                    | China             | N/A           |
| 6         | Dew-Point indirect evaporative cooler and Direct evaporative cooler | Poultry house | Not indicated | hot and humid                                                          | Qatar             | LCC           |

**Table S2.**Configurations of the target data centre<sup>7</sup>

|                                                |                                                                                                                        |
|------------------------------------------------|------------------------------------------------------------------------------------------------------------------------|
| Floor Area                                     | 2,250 m <sup>2</sup> × 9 stories                                                                                       |
| Number of Servers                              | 720 units/floor × 9 stories                                                                                            |
| Heat gains from Server Computers               | 2,880 kW/floor × 9 stories                                                                                             |
| Lighting                                       | 49.5 kW/floor × 9 stories                                                                                              |
| Others heat resources:<br>Lightening<br>People | Sensible heat:<br>60W/person × 20persons/floor × 9 stories<br>Latent heat:<br>40W/person × 20persons/floor × 9 stories |

**Table S3.** The thermal output timetable for server computers<sup>7, 8</sup>

| <b>Time</b> | <b>Weekday (%)</b> | <b>Weekend (%)</b> |
|-------------|--------------------|--------------------|
| 00:00-09:00 | 90                 | 80                 |
| 09:00-21:00 | 100                | 90                 |
| 21:00-24:00 | 90                 | 80                 |

**Table S4.** Interpreting symbols for various climates in the Köppen-Geiger

| Classification System <sup>3, 9-11</sup> |                      |                    |
|------------------------------------------|----------------------|--------------------|
| Symbol meaning for Climate Description   |                      |                    |
| 1st Symbol                               | 2nd Symbol           | 3rd Symbol         |
| <b>A_tropical</b>                        | f_Rainforest         |                    |
|                                          | m_Monsoon            |                    |
|                                          | w_Savannah           |                    |
|                                          |                      |                    |
| <b>B_Arid</b>                            | W_Desert             |                    |
|                                          | S_Steppe             |                    |
|                                          |                      | h_Hot              |
|                                          |                      | k_Cold             |
| <b>C_Temperate</b>                       | s_Dry summer         |                    |
|                                          | w_Dry winter         |                    |
|                                          | f_Without dry season |                    |
|                                          |                      | a_Hot summer       |
|                                          |                      | b_Warm summer      |
|                                          |                      | c_Cold summer      |
|                                          |                      |                    |
| <b>D_Cold</b>                            | s_Dry summer         |                    |
|                                          | W_Dry winter         |                    |
|                                          | f_Without dry season |                    |
|                                          |                      | a_Hot summer       |
|                                          |                      | b_Warm summer      |
|                                          |                      | c_Cold summer      |
|                                          |                      | d_Very cold summer |
| <b>E_Polar</b>                           | T_Tundra             |                    |
|                                          | F_Frost              |                    |

**Table S5.** Worldwide weather stations considered in this study<sup>9, 12</sup>

| Climate Classification | Cities   | Latitude | Jan-Mar           |                              | Apr-Jun           |                              | Jul-Sep           |                              | Oct-Dec           |                              |
|------------------------|----------|----------|-------------------|------------------------------|-------------------|------------------------------|-------------------|------------------------------|-------------------|------------------------------|
|                        |          |          | average D.B.T(°C) | average Humidity ratio(g/kg) |
| BWh                    | Jeddah   | 21.48    | 24.5              | 9.7                          | 31.3              | 14.0                         | 33.9              | 16.7                         | 28.5              | 14.1                         |
| BWh                    | Riyadh   | 24.68    | 18.4              | 4.4                          | 32.5              | 5.4                          | 36.1              | 6.4                          | 23.0              | 6.2                          |
| BWh                    | Dubai    | 25.27    | 23.2              | 9.4                          | 32.5              | 13.2                         | 35.9              | 17.1                         | 27.8              | 13.2                         |
| Cfa                    | Atlanta  | 33.75    | 9.9               | 4.9                          | 21.9              | 10.6                         | 24.9              | 14.6                         | 12.0              | 6.4                          |
| Cfa                    | New York | 40.71    | 3.5               | 3.2                          | 17.0              | 7.7                          | 24.5              | 11.9                         | 9.5               | 5.0                          |
| Csa                    | Madrid   | 40.42    | 8.7               | 4.4                          | 18.8              | 6.1                          | 25.9              | 7.2                          | 12.7              | 6.8                          |
| Cfb                    | London   | 51.51    | 7.9               | 5.1                          | 14.4              | 6.7                          | 19.5              | 8.7                          | 10.2              | 6.7                          |
| Dwa                    | Seoul    | 37.56    | 1.6               | 2.7                          | 19.0              | 8.8                          | 25.2              | 15.3                         | 7.3               | 4.7                          |
| Dwa                    | Beijing  | 39.91    | 1.0               | 1.9                          | 20.7              | 8.0                          | 25.0              | 14.0                         | 4.8               | 3.3                          |
| Dfa                    | Windsor  | 42.32    | -1.5              | 2.5                          | 15.7              | 7.3                          | 22.2              | 11.2                         | 6.4               | 4.2                          |

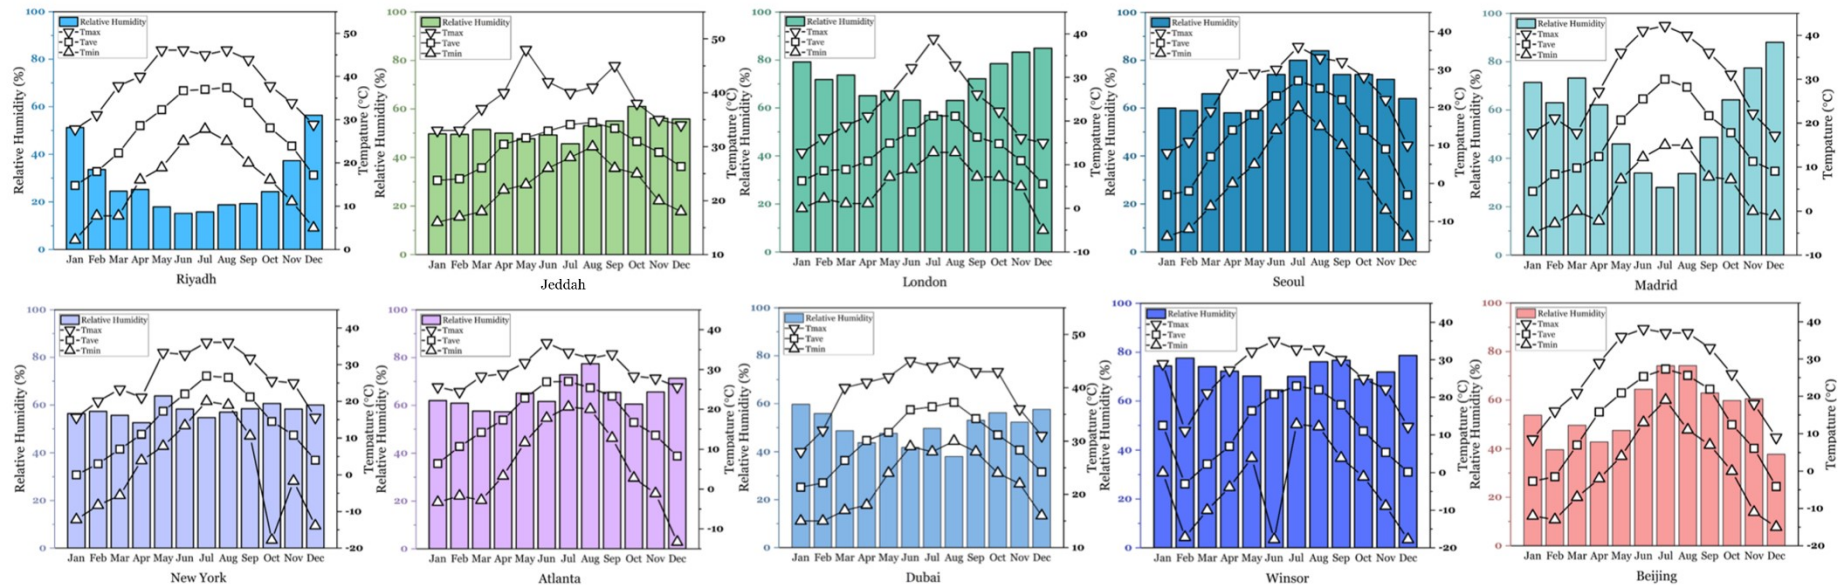

**Figure S1.** Annual Weather Data for Cities<sup>13</sup>

**Table S6.** Cost analysis parameters for the selected cities.

| City     | Average discount rate (%) | Average inflation rate (%) | Average real                             |                                      | CO2 index (ton CO2/MWh) | Unit Cost of CO2 emission (USD/ton of CO2) |
|----------|---------------------------|----------------------------|------------------------------------------|--------------------------------------|-------------------------|--------------------------------------------|
|          |                           |                            | escalation rate of electricity price (%) | Industry electricity price (USD/MWh) |                         |                                            |
| Jeddah   | 2 <sup>2</sup>            | 1.87 <sup>14</sup>         | 0 <sup>15</sup>                          | 47.96 <sup>16</sup>                  | 0.57 <sup>17</sup>      | 0                                          |
| Riyadh   |                           |                            |                                          |                                      |                         |                                            |
| Dubai    | 1.60 <sup>18</sup>        | 0.78 <sup>19</sup>         | 0.124 <sup>20</sup>                      | 62.62 <sup>21</sup>                  | 0.40 <sup>17</sup>      | 0                                          |
| Atlanta  |                           |                            |                                          |                                      |                         |                                            |
| New York | 0.25 <sup>22</sup>        | 3.63 <sup>23</sup>         | 5.60 <sup>24</sup>                       | 83.5 <sup>25</sup>                   | 0.37 <sup>26</sup>      | 15.33 <sup>27</sup>                        |
| Madrid   | 1.34 <sup>28</sup>        | 2.70 <sup>29</sup>         | 0.85 <sup>30, 31</sup>                   | 223.88 <sup>32</sup>                 | 0.22 <sup>33</sup>      | 85.28 <sup>34</sup>                        |
| London   | -1.30 <sup>35</sup>       | 3.36 <sup>36</sup>         | 15.4 <sup>37</sup>                       | 241.22 <sup>38</sup>                 | 0.26 <sup>17</sup>      | 65.01 <sup>39</sup>                        |
| Seoul    | 1 <sup>40</sup>           | 2 <sup>41</sup>            | 2.20 <sup>42</sup>                       | 87 <sup>43</sup>                     | 0.44 <sup>26</sup>      | 18.53 <sup>34</sup>                        |
| Beijing  | 2.90 <sup>44</sup>        | 2.01 <sup>45</sup>         | 1.28 <sup>46</sup>                       | 64.6 <sup>25</sup>                   | 0.53 <sup>26</sup>      | 7.29 <sup>47</sup>                         |
| Windsor  | 3.42 <sup>48</sup>        | 3.02 <sup>49</sup>         | 1.43 <sup>50</sup>                       | 75.03 <sup>51</sup>                  | 0.13 <sup>26</sup>      | 37.69 <sup>52</sup>                        |

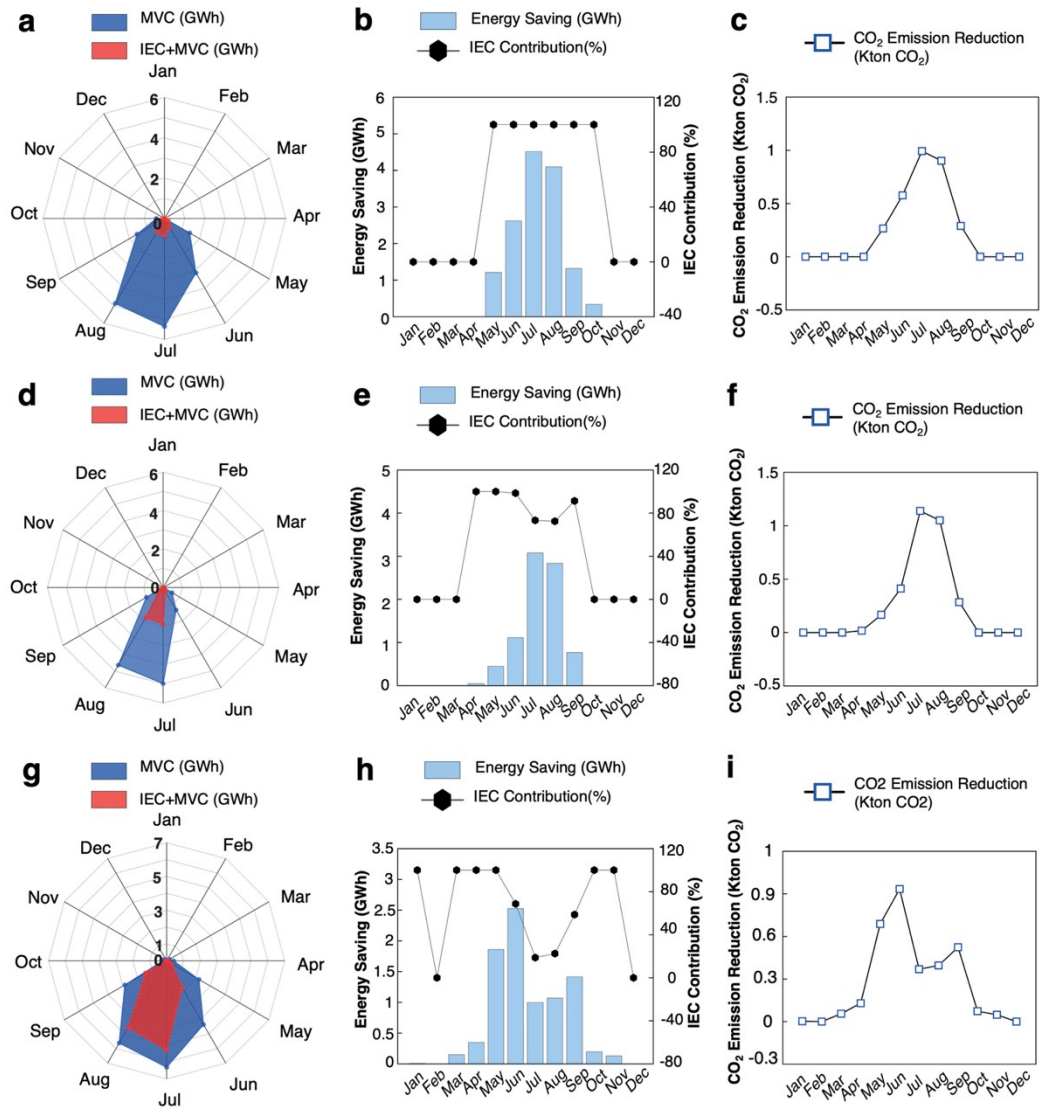

**Figure S2.** (a) Madrid Comparison of Energy Consumption (b) Madrid Energy Saving (c) Madrid CO<sub>2</sub> Emission Reduction (d) New York Comparison of Energy Consumption (e) New York Energy Saving (f) New York CO<sub>2</sub> Emission Reduction (g) Atlanta Comparison of Energy Consumption (h)Atlanta Energy Saving (i) Atlanta CO<sub>2</sub> Emission Reduction

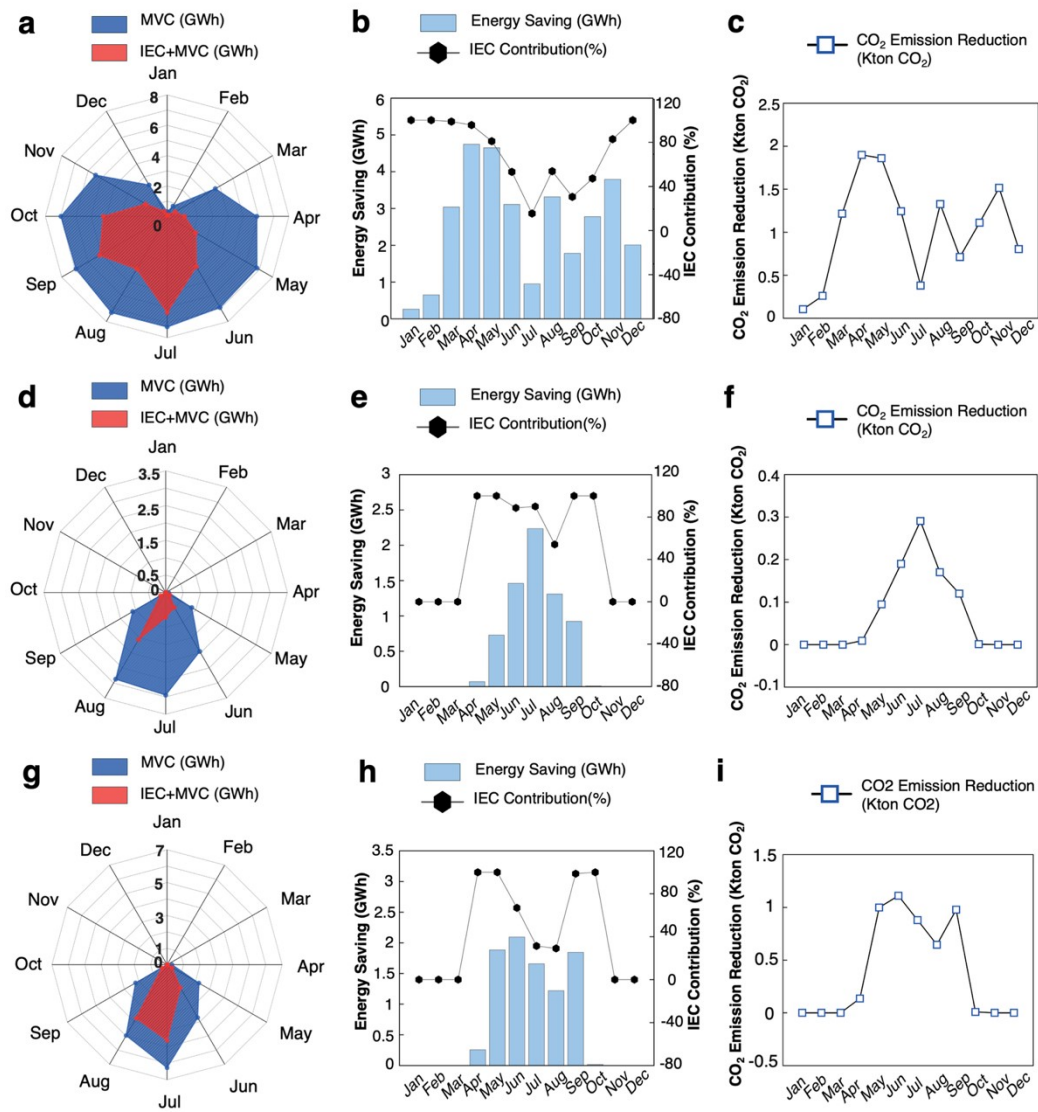

**Figure S3.** (a) Dubai Comparison of Energy Consumption (b) Dubai Energy Saving (c) Dubai CO<sub>2</sub> Emission Reduction (d) Windsor Comparison of Energy Consumption (e) Windsor Energy Saving (f) Windsor CO<sub>2</sub> Emission Reduction (g) Beijing Comparison of Energy Consumption (h) Beijing Energy Saving (i) Beijing CO<sub>2</sub> Emission Reduction



## References

1. V. V. Rao and S. P. Datta, *Applied Thermal Engineering*, 2020, **168**, 114813.
2. Q. Chen, M. Burhan, M. W. Shahzad, D. Ybyraiymkul, S. Oh, X. Cui and K. C. Ng, *Frontiers in Built Environment*, 2022, **8**, 1032961.
3. A. Sohani and H. Sayyaadi, *Applied Thermal Engineering*, 2017, **123**, 1396-1418.
4. X. Ma, C. Zeng, Z. Zhu, X. Zhao, X. Xiao, Y. G. Akhlaghi and S. Shittu, *Applied Energy*, 2023, **348**, 121483.
5. Q. Wei, J. Lu, X. Xia, B. Zhang, X. Ying and L. Li, *Buildings*, 2024, **14**, 3623.
6. J. P. Harrouz, E. Katramiz, K. Ghali, D. Ouahrani and N. Ghaddar, *Energy Conversion and Management*, 2021, **245**, 114556.
7. J.-Y. Kim, H.-J. Chang, Y.-H. Jung, K.-M. Cho and G. Augenbroe, *Energy and Buildings*, 2017, **138**, 257-270.
8. K. Cho, H. Chang, Y. Jung and Y. Yoon, *Sustainable Cities and Society*, 2017, **31**, 234-243.
9. A. Sohani, H. Sayyaadi and N. Mohammadhosseini, *Energy Conversion and Management*, 2018, **158**, 327-345.
10. A. Sohani, H. Sayyaadi and S. Hoseinpoori, *International Journal of Refrigeration*, 2016, **69**, 186-204.
11. M. C. Peel, B. L. Finlayson and T. A. McMahon, *Hydrology and earth system sciences*, 2007, **11**, 1633-1644.
12. Visual Crossing, <https://www.visualcrossing.com/weather-data>, (accessed 2 May, 2024).
13. Weather Underground, <https://www.wunderground.com/>, (accessed 1 Mar, 2025).
14. International Monetary Fund, Inflation rate in Saudi Arabia from 1987 to 2029 (compared to previous year) [Graph].In Statista, <https://www.statista.com/statistics/268062/inflation-in-saudi-arabia/>, (accessed 25 Apr, 2024).
15. CEIC, Saudi Arabia Consumer Price Index (CPI): Weights: HW: Electricity, Gas and Other Fuels (EG), <https://www.ceicdata.com/en/saudi-arabia/consumer-price-index-2018100-weights/cpi-weights-hw-electricity-gas-and-other-fuels-eg>, (accessed 10 Jun, 2024).
16. BloombergNEF, Saudi Arabia, <https://www.global-climatescope.org/markets/sa/>, (accessed 15 Jul, 2024).
17. CarbonFootprint, International Factor Release, <https://www.carbonfootprint.com/>, (accessed 15 Jun, 2024).
18. CEIC, United Arab Emirates Policy Rate, <https://www.ceicdata.com/en/indicator/united-arab-emirates/policy-rate>, (accessed 16 Jun, 2024).

19. WorldBank, UAE Inflation Rate 1960-2024, <https://www.macrotrends.net/global-metrics/countries/ARE/uae/inflation-rate-cpi>>UAE Inflation Rate 1960-2024. [www.macrotrends.net](https://www.macrotrends.net). , (accessed 12 May, 2024).
20. CEIC, United Arab Emirates Consumer Price Index (CPI), <https://www.ceicdata.com/en/united-arab-emirates/consumer-price-index-2014100-abu-dhabi-weights/cpi-weights-abu-dhabi-housing-water-electricity-gas-and-other-fuels>, (accessed 15 Jun, 2024).
21. BloombergNEF, United Arab Emirates, <https://www.global-climatescope.org/markets/ae/>, (accessed 12 May, 2024).
22. InternationalMonetaryFund, Interest Rates, Discount Rate for United States [INTDSRUSM193N], retrieved from FRED, Federal Reserve Bank of St. Louis, <https://fred.stlouisfed.org/series/INTDSRUSM193N>, (accessed 12 June, 2024).
23. Statista, Inflation rate and Federal Reserve interest rate monthly in the United States from January 2018 to April 2024 [Graph], <https://www.statista.com/statistics/1312060/us-inflation-rate-federal-reserve-interest-rate-monthly/>, (accessed 12 Jun, 2024).
24. U.S. Bureau of Labor Statistics, Consumer Price Index, Calendar Year Historical, 2019-2023, [https://www.bls.gov/regions/southwest/data/consumerpriceindexcyhistorical\\_southwest\\_table.htm](https://www.bls.gov/regions/southwest/data/consumerpriceindexcyhistorical_southwest_table.htm), (accessed 12 Jun, 2024).
25. International Energy Agency, *Industry end-user prices for electricity in selected countries, 2019-March 2023*, 2023.
26. Ember, Electricity generation emission intensity in selected countries worldwide in 2023 (in grams of carbon dioxide per kilowatt-hour) [Graph].In Statista., <https://www.statista.com/statistics/943137/global-emissions-intensity-power-sector-by-country/>, (accessed 10 Jul, 2024).
27. U.S. Energy Information Administration, RGGI carbon dioxide emissions price reached new quarterly record in June 2022, <https://www.eia.gov/todayinenergy/detail.php?id=53759>, (accessed 12 Jun, 2024).
28. CEIC, Spain Policy Rate 1999 - 2024, [https://www.ceicdata.com/en/indicator/spain/policy-rate#:~:text=Spain%20cash%20rate%20\(Policy%20Rate,Jan%201999%20to%20Jan%202024](https://www.ceicdata.com/en/indicator/spain/policy-rate#:~:text=Spain%20cash%20rate%20(Policy%20Rate,Jan%201999%20to%20Jan%202024)., (accessed 14 Jun, 2024).
29. International Monetary Fund, Spain: Inflation rate from 1987 to 2029 (compared to the previous year) [Graph],In Statista., <https://www.statista.com/statistics/271077/inflation-rate-in-spain/>, (accessed 25 Jun, 2024).
30. INE(Spain), Annual average consumer price index (CPI) of housing, water, electricity, gas and other fuels in Spain from 2007 and 2021 [Graph].In Statista., <https://www.statista.com/statistics/771881/annual-average-consumer-price-index-cpi-of-housing-water-electricity-gas-and-other-fuels-in-spain/>, (accessed 10 Jul, 2024).

31. Eurostat, Harmonized index of consumer prices (HICP) energy inflation rate in Spain from January 2019 to May 2024, by commodity [Graph].In Statista., <https://www.statista.com/statistics/1329221/spain-energy-inflation-rate-by-commodity/>, (accessed 18 Jun, 2024).
32. UK Department for Energy Security and Net Zero, Energy Prices International Comparisons\_ Industrial electricity prices in the EU, [https://assets.publishing.service.gov.uk>table\\_541](https://assets.publishing.service.gov.uk>table_541), (accessed 10 Jun, 2024).
33. Ember, Carbon intensity of the power sector in the European Union in 2023, by country (in grams of CO<sub>2</sub> per kilowatt-hour) [Graph].In Statista., <https://www.statista.com/statistics/1291750/carbon-intensity-power-sector-eu-country/>, (accessed 10 Jun, 2024).
34. ICAP, ICAP Allowance Price Explorer, <https://icapcarbonaction.com/en/ets-prices>, (accessed 12 May, 2024).
35. UK Department of Health & Social Care, Guidance: DHSC group accounting manual 2021 to 2022: additional guidance, version 2, <https://www.gov.uk/government/publications/dhsc-group-accounting-manual-2021-to-2022/departments-of-health-and-social-care-group-accounting-manual-2021-to-2022-additional-guidance-version-1>, (accessed 15 May, 2024).
36. International Monetary Fund, United Kingdom (UK): Inflation rate from 1989 to 2029 (compared to the previous year) [Graph].In Statista., <https://www.statista.com/statistics/270384/inflation-rate-in-the-united-kingdom/>, (accessed 10 May, 2024).
37. Office for National Statistics (UK), Consumer price index (CPI) of electricity annually in the United Kingdom (UK) from 2008 to 2023 [Graph].In Statista., <https://www.statista.com/statistics/286548/electricity-consumer-price-index-cpi-annual-average-uk/>, (accessed 23 May, 2024).
38. UK Department for Energy Security and Net Zero, Electricity prices for non-domestic consumers in the United Kingdom (UK) from 2008 to 2022 (in pence per kilowatt-hour) [Graph]. In Statista., <https://www.statista.com/statistics/595864/electricity-industry-price-uk/>, (accessed 10 Apr, 2024).
39. UK Department for Energy Security and Net Zero, Guidance UK ETS: Carbon prices for use in civil penalties, 2021 and 2022, <https://www.gov.uk/government/publications/determinations-of-the-uk-ets-carbon-price/uk-ets-carbon-prices-for-use-in-civil-penalties-2021-and-2022#:~:text=the%20carbon%20price%20for%20the%20scheme%20year%20beginning%20on%201,January%202022%20is%20%C2%A352.56>, (accessed 12 May, 2024).
40. International Monetary Fund, Interest Rates, Discount Rate for Republic of Korea [INTDSRKRM193N],retrieved from FRED, Federal Reserve Bank of St. Louis, <https://fred.stlouisfed.org/series/INTDSRKRM193N>, (accessed 12 Jun, 2024).

41. International Monetary Fund, South Korea: Inflation rate from 1987 to 2029 (compared to the previous year) [Graph].In Statista., <https://www.statista.com/statistics/377275/inflation-rate-in-south-korea/>, (accessed 12 May, 2024).
42. Bank of Korea, Producer price index (PPI) of electric power in South Korea 2011-2023 [Graph].In Statista., <https://www.statista.com/statistics/1249589/south-korea-ppi-electric-power/>, (accessed 10 May, 2024).
43. Enerdata, *South Korea energy report*, 2024.
44. International Monetary Fund, Interest Rates, Discount Rate for China [INTDSRCNM193N], retrieved from FRED, Federal Reserve Bank of St. Louis;, <https://fred.stlouisfed.org/series/INTDSRCNM193N>, (accessed 10 Jun, 2024).
45. International Monetary Fund and National Bureau of Statistics of China, Inflation rate in China from 2013 to 2023 with forecasts until 2029 [Graph]. In Statistics., <https://www.statista.com/statistics/270338/inflation-rate-in-china/>, (accessed 12 Jun, 2024).
46. National Bureau of Statistics of China, Consumer Price Index, <https://www.stats.gov.cn/>, (accessed 12 Jun, 2024).
47. China Carbon Forum, Projected average carbon prices covered by the national emissions trading scheme (ETS) in China from 2022 to 2030 (in yuan per metric ton of carbon dioxide) [Graph].In Statistics., <https://www.statista.com/statistics/1175780/china-estimated-average-prices-in-the-ets/>, (accessed 16 May, 2024).
48. Bank of Canada, Policy interest rate, <https://www.bankofcanada.ca/core-functions/monetary-policy/key-interest-rate/>, (accessed 6 May 2024, 2024).
49. RI, Canadian Inflation Rates: 1990 to 2024, <https://www.rateinflation.com/inflation-rate/canada-historical-inflation-rate/>, (accessed 16 May, 2024).
50. Statistics Canada, Prices and inflation, <https://www150.statcan.gc.ca/n1/pub/12-581-x/2022001/sec13-eng.htm>, (accessed 16 May, 2024).
51. Energyhub, Average monthly electricity costs for end-users in Canada as of September 2023, by province and territory (in Canadian cents per kilowatt-hour) [Graph].In Statista., <https://www.statista.com/statistics/516279/electricity-costs-for-end-users-canada-by-province/>, (accessed 12 Mar, 2024).
52. Government of Canada, Pricing carbon pollution, <https://www.canada.ca/en/services/environment/weather/climatechange/climate-plan/climate-plan-overview/healthy-environment-healthy-economy/annex-pricing-carbon-pollution.html>, (accessed 12 Jun, 2024).
